# Supplementary material for: The electrochemical oxidation of ammonia at boron-doped diamond electrodes exhibits analytically useful signals in aqueous solutions
Source: Royal Society of Chemistry journal article supplement (doi:10.1039/b508975a), 2005-01-01
Supplement: b508975a-1.pdf [file b508975a-1.pdf]

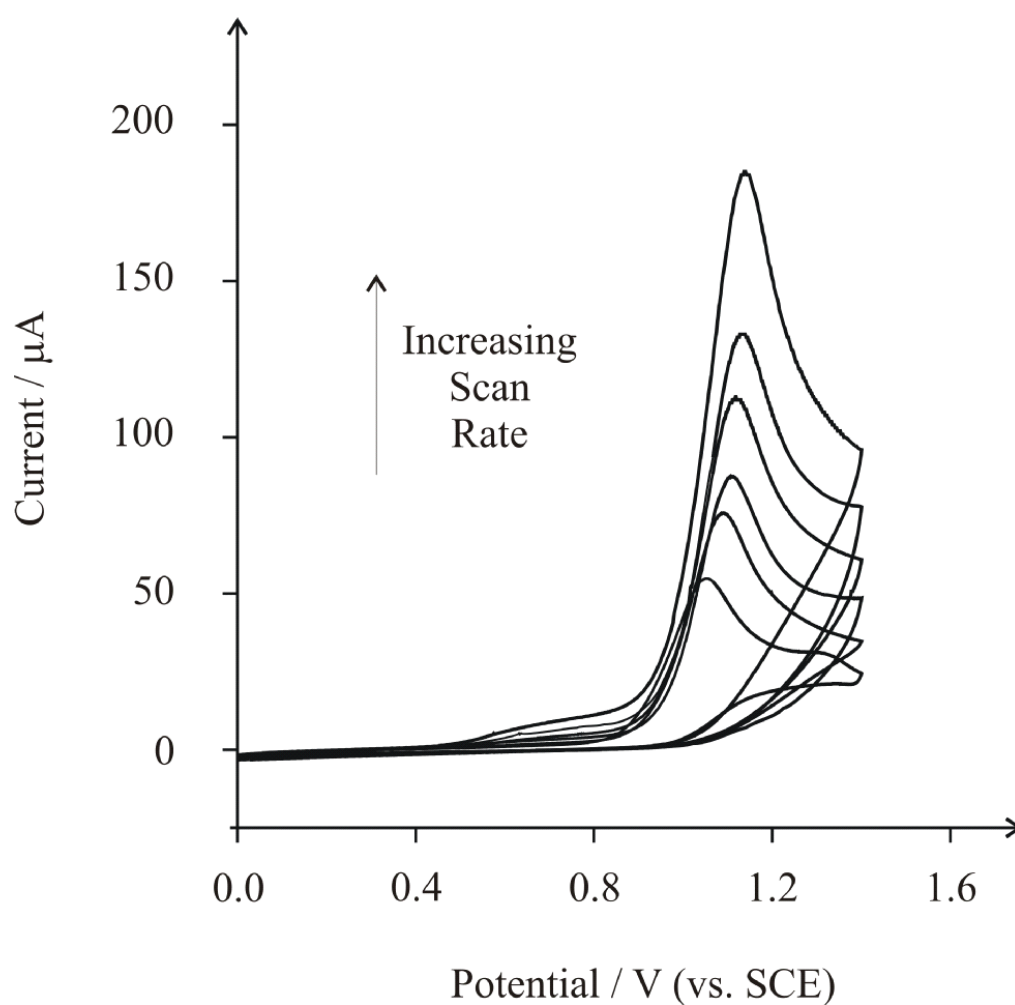

**ESI A** Response of increasing the scan rate at a boron-doped diamond electrode (3 mm diameter) in a 0.1 M KCl solution which has had 0.1 % ammonia bubbled through it for 30 minutes. The scan rates are (from bottom to top) 50, 100, 200, 300, 500, 800  $\text{mV s}^{-1}$ .
