# Supplementary material for: The electrochemical oxidation of ammonia at boron-doped diamond electrodes exhibits analytically useful signals in aqueous solutions
Source: Royal Society of Chemistry journal article supplement (doi:10.1039/b508975a), 2005-01-01
Supplement: b508975a-2.pdf [file b508975a-2.pdf]

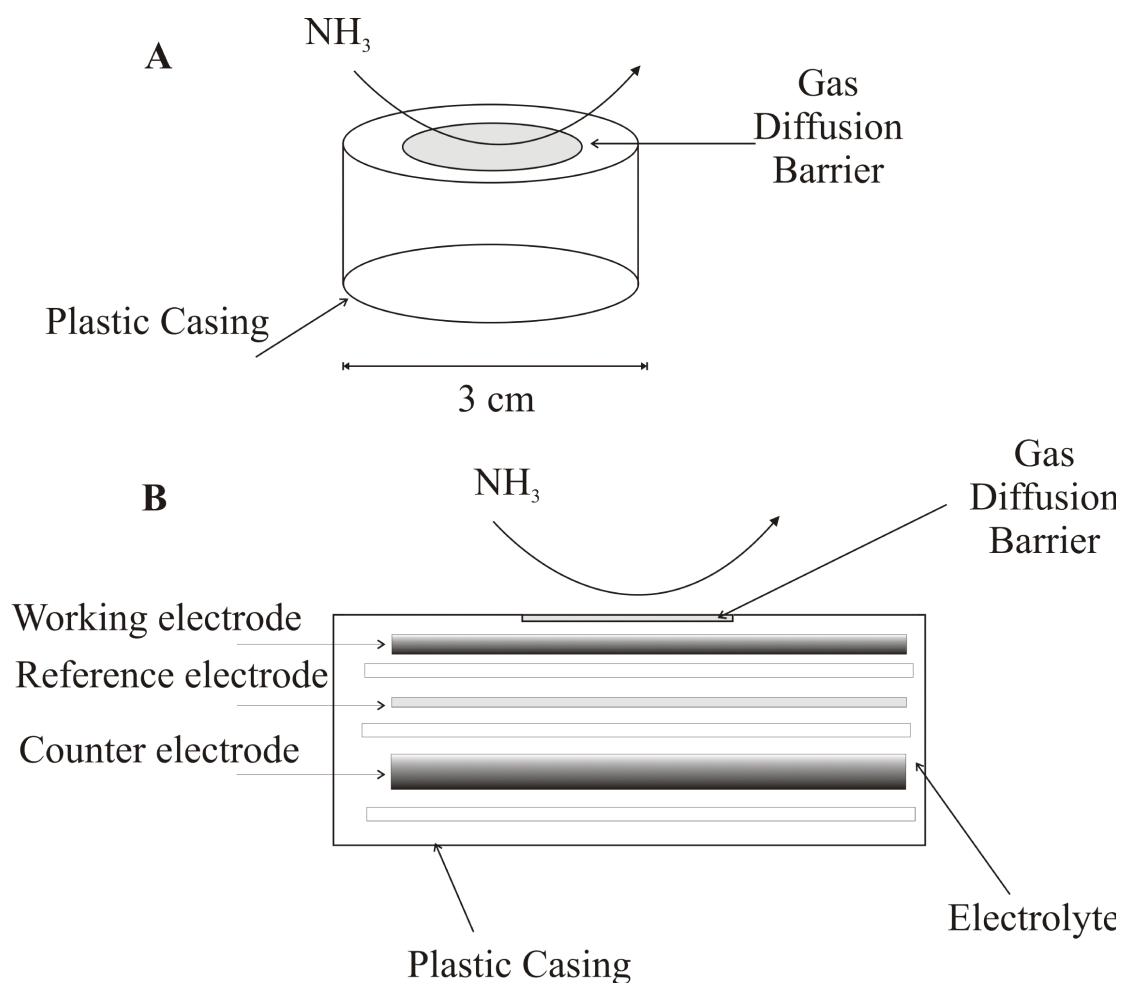

**ESI B** Schematic representation of an electrochemical gas sensor (A) incorporating a gas diffusion membrane which is approximately 3 cm by 1.5 cm. The sensor is based on a three-electrode arrangement (B) with BDD as the working electrode with a graphite counter and a silver wire as the reference electrode. The supporting electrolyte was 0.1 M KCl.
